# Supplementary material
Source: HighWire-hosted journal article supplement (https://jitc.bmj.com/content/8/1/e000649)

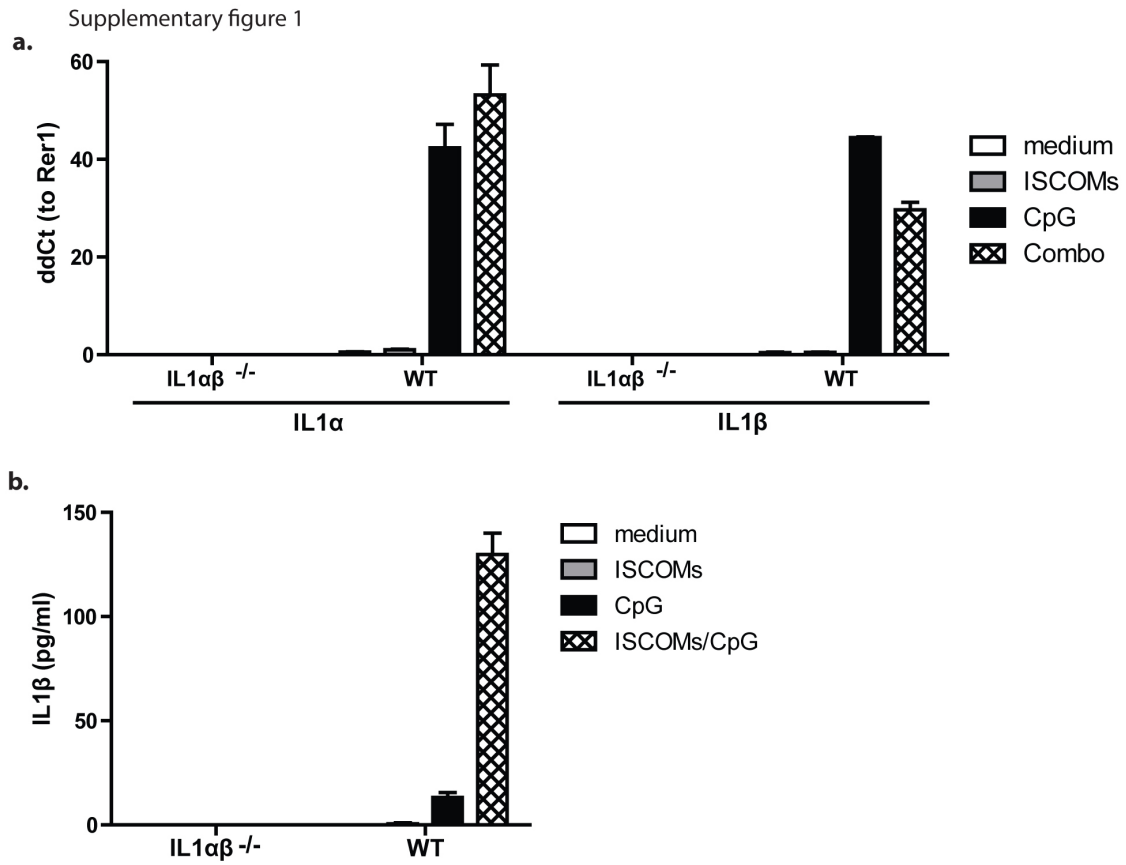

Supplement: inline-supplementary-material-1 [file inline-supplementary-material-1.pdf]

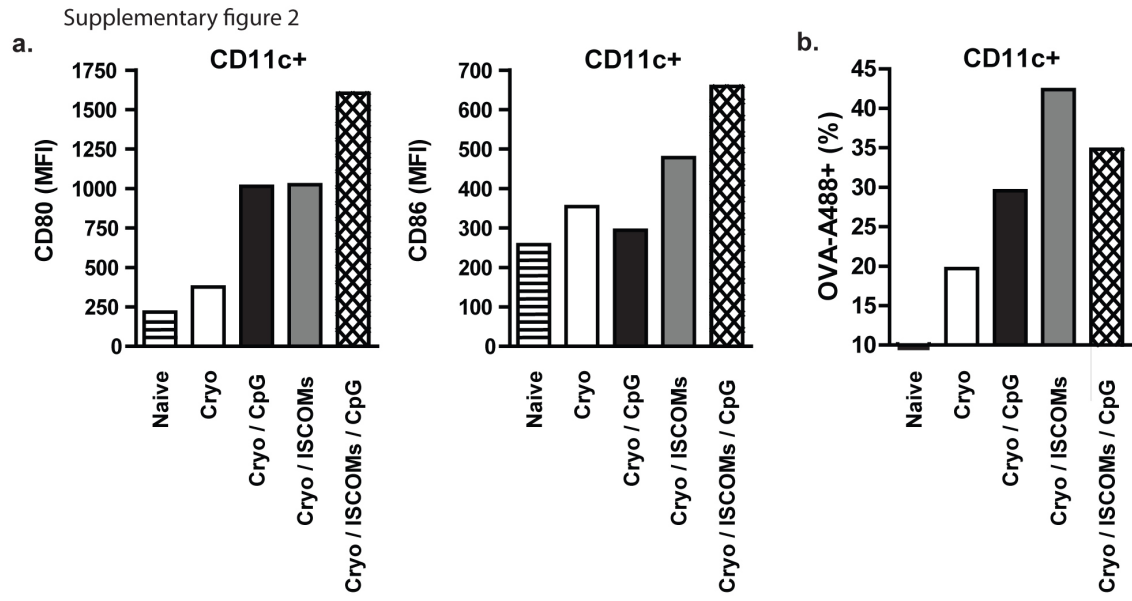

Supplement: inline-supplementary-material-2 [file inline-supplementary-material-2.pdf]

a. Supplementary figure 3

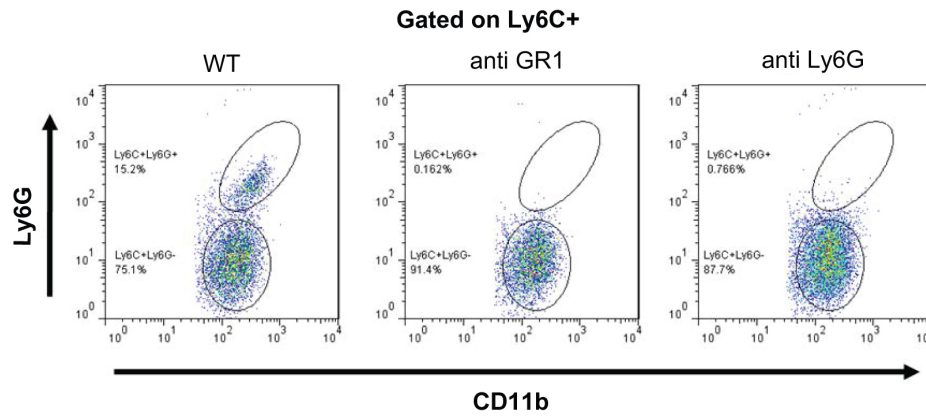

b.

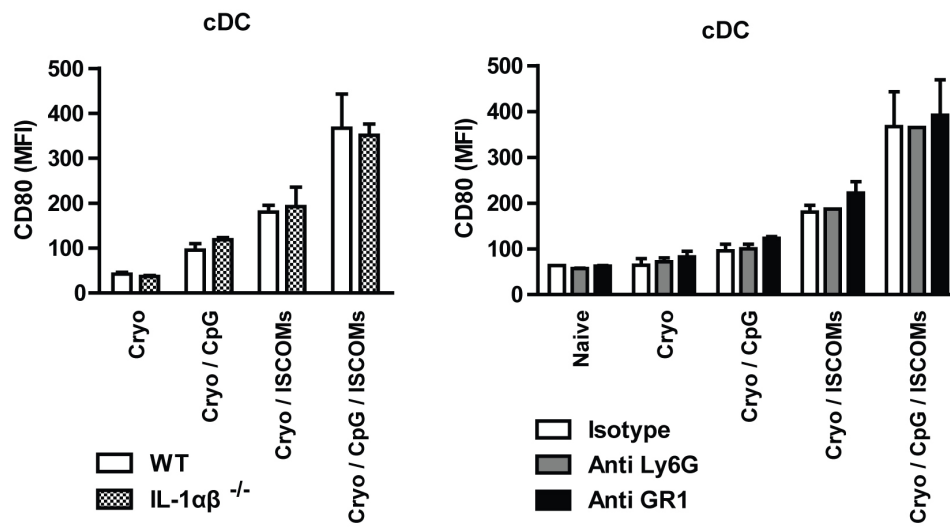

c.

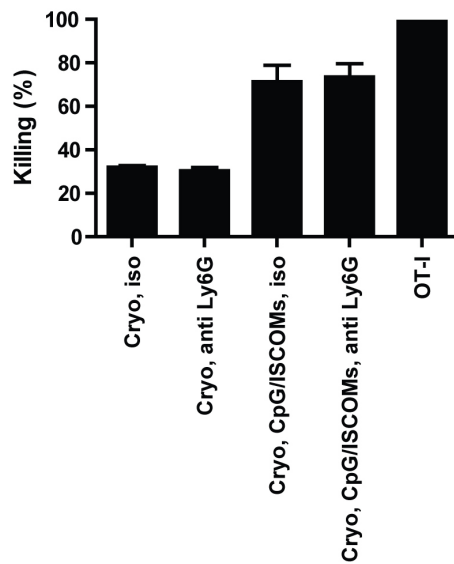

Supplement: inline-supplementary-material-3 [file inline-supplementary-material-3.pdf]
